# Supplementary material
Source: Research Square preprint supplement (doi:10.21203/rs.3.rs-9905701/v1)
Supplement: Supplementary file 1 [file 61d2d00b1cec656c26ee4602.docx]

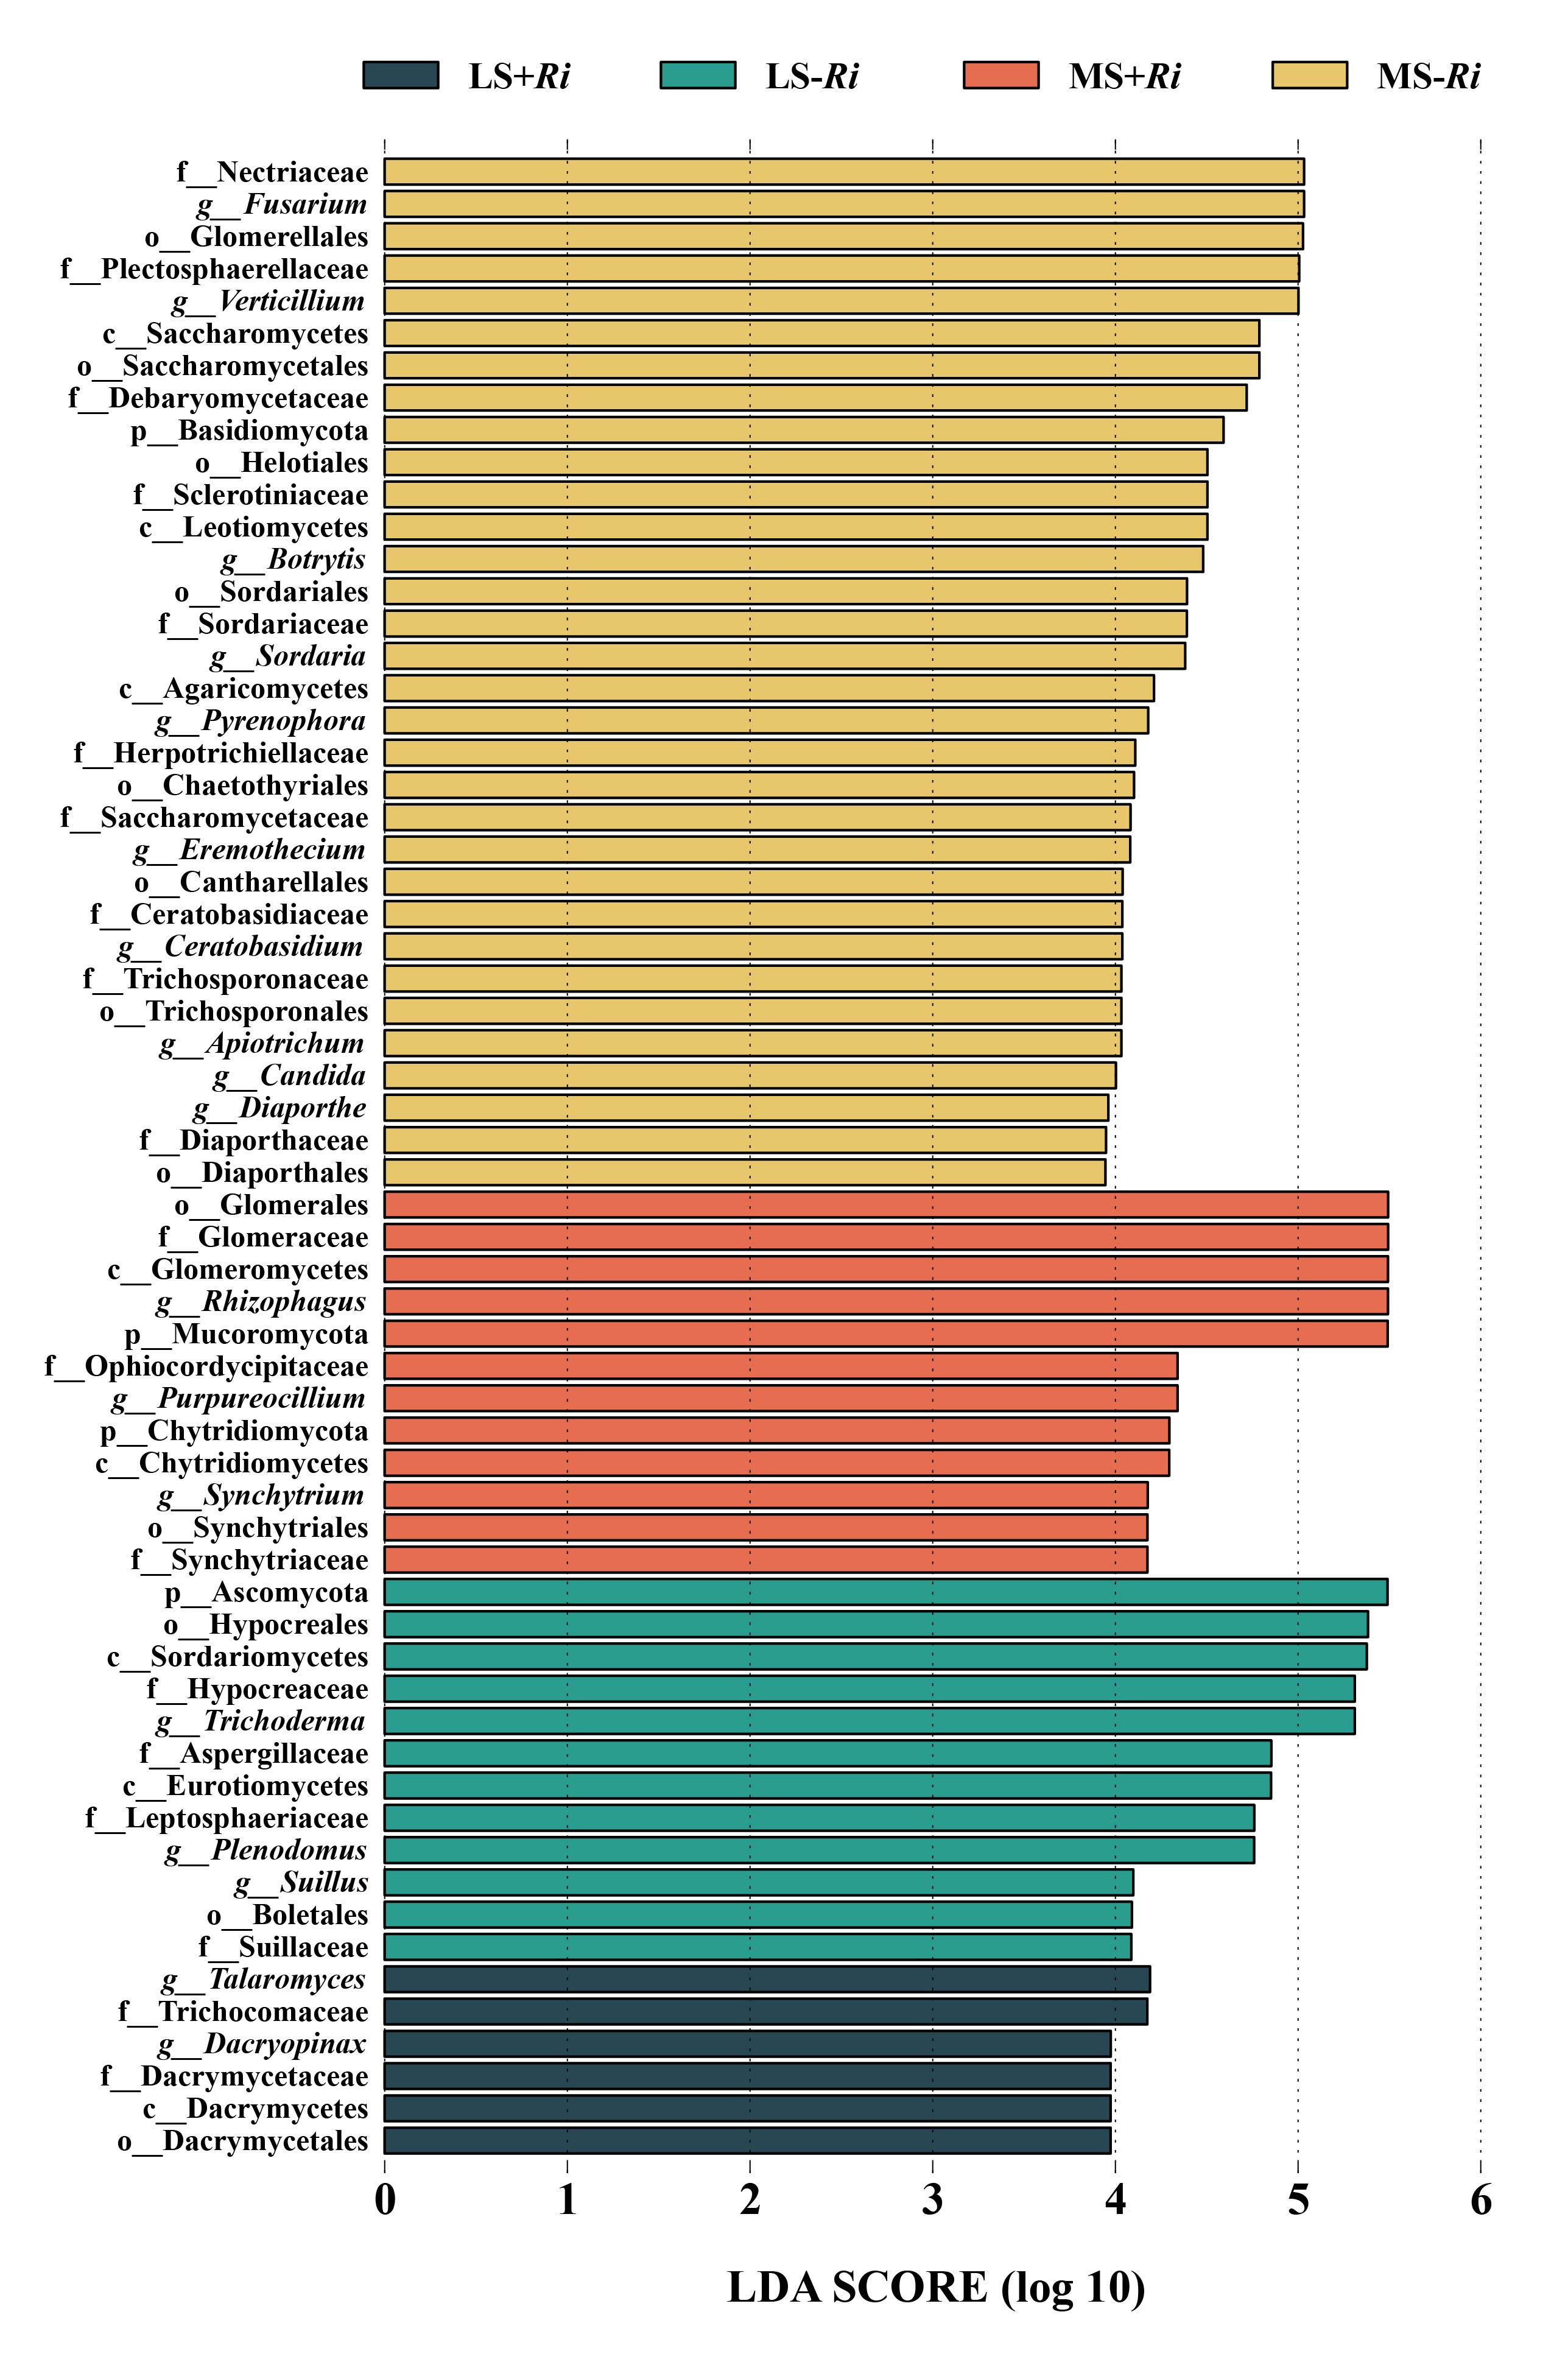


**Fig. S1 Bar plot of linear discriminant analysis effect size (LEfSe) scores at the genus level, depicting the significance and magnitude of differential abundance among treatments (LDA score threshold = 3.5).**

**Table S1 Gene designations, associated pathways, and functional descriptions of the genes investigated in this study as retrieved from the Kyoto Encyclopedia of Genes and Genomes (KEGG) database.**

| **Name** | **# Gene Family** | **Pathway** | **Description** |
| --- | --- | --- | --- |
| *phoU* | K02039 |  | phosphate transport system protein |
| *phoR* | K07636 | map02020 | two-component system, OmpR family, phosphate regulon sensor histidine kinase PhoR |
| *phoB* | K07657 | map02020 | two-component system, OmpR family, phosphate regulon response regulator PhoB |
| *phoP* | K07660 | map01503  map02020 | two-component system, OmpR family, response regulator PhoP |
| *ugpB* | K05813 | map02010 | sn-glycerol 3-phosphate transport system substrate-binding protein |
| *ugpA* | K05814 | map02010 | sn-glycerol 3-phosphate transport system permease protein |
| *ugpE* | K05815 | map02010 | sn-glycerol 3-phosphate transport system permease protein |
| *ugpC* | K05816 | map02010 | sn-glycerol 3-phosphate transport system ATP-binding protein |
| *phnC* | K02041 | map02010 | phosphonate transport system ATP-binding protein |
| *phnE* | K02042 | map02010 | phosphonate transport system permease protein |
| *phnD* | K02044 | map02010 | phosphonate transport system substrate-binding protein |
| *pstB* | K02036 | map02010 | phosphate transport system ATP-binding protein |
| *pstC* | K02037 | map02010 | phosphate transport system permease protein |
| *pstA* | K02038 | map02010 | phosphate transport system permease protein |
| *pstS* | K02040 | map02010  map02020  map05152 | phosphate transport system substrate-binding protein |
| *TC.PIT* | K03306 |  | inorganic phosphate transporter, PiT family |
| *gcd* | K00117 | map01130  map00030  map01100  map01110 | quinoprotein glucose dehydrogenase |
| *phoN* | K09474 | map00740  map01100  map02020 | acid phosphatase (class A) |
| *phnL* | K05780 | map00440 | alpha-D-ribose 1-methylphosphonate 5-triphosphate synthase subunit PhnL |
| *phnK* | K05781 |  | putative phosphonate transport system ATP-binding protein |
| *phnM* | K06162 | map00440 | alpha-D-ribose 1-methylphosphonate 5-triphosphate diphosphatase |
| *phnJ* | K06163 | map00440 | alpha-D-ribose 1-methylphosphonate 5-phosphate C-P lyase |
| *phnI* | K06164 | map00440 | alpha-D-ribose 1-methylphosphonate 5-triphosphate synthase subunit PhnI |
| *phnH* | K06165 | map00440 | alpha-D-ribose 1-methylphosphonate 5-triphosphate synthase subunit PhnH |
| *phnG* | K06166 | map00440 | alpha-D-ribose 1-methylphosphonate 5-triphosphate synthase subunit PhnG |
| *phnP* | K06167 | map00440 | phosphoribosyl 1,2-cyclic phosphate phosphodiesterase |
| *phnF* | K02043 |  | GntR family transcriptional regulator, phosphonate transport system regulatory protein |
| *ppa* | K01507 | map00190 | inorganic pyrophosphatase |
| *phnA* | K19670 | map00440 | phosphonoacetate hydrolase |
| *phnW* | K03430 | map01120 map01100 map00440 | 2-aminoethylphosphonate-pyruvate transaminase |
| *ugpQ* | K01126 | map00564 | glycerophosphoryl diester phosphodiesterase |
| *phoD* | K01113 | map00790  map01100  map02020 | alkaline phosphatase D |
| *phnN* | K05774 | map00030 | ribose 1,5-bisphosphokinase |
| *ppaC* | K15986 | map00190 | manganese-dependent inorganic pyrophosphatase |

**Table S2 Direct, indirect, and total path coefficients for each pathway within the partial least squares path model (PLS-PM).**

| **Relationships** | **Direct** | **Indirect** | **Total** |
| --- | --- | --- | --- |
| AM Fungi Inoculation -> Soil Chemical Property | -0.551 | 0 | -0.5507 |
| AM Fungi Inoculation -> Ions In Sodic Saline Soil | -0.302 | 0 | -0.3023 |
| AM Fungi Inoculation -> Soil Physical Structure | -0.683 | 0 | -0.6828 |
| AM Fungi Inoculation -> ALP Activity | 0 | 0.5464 | 0.5464 |
| AM Fungi Inoculation -> P Cycle Functional Genes | 0 | -0.036 | -0.036 |
| AM Fungi Inoculation -> Soil P Pool | 0 | -0.1065 | -0.1065 |
| AM Fungi Inoculation -> Plant Growth Performance | 0 | 0.5445 | 0.5445 |
| Sodic Saline Soil -> Soil Chemical Property | 0.807 | 0 | 0.8069 |
| Sodic Saline Soil -> Ions In Sodic Saline Soil | 0.942 | 0 | 0.9423 |
| Sodic Saline Soil -> Soil Physical Structure | -0.106 | 0 | -0.1059 |
| Sodic Saline Soil -> ALP Activity | 0 | -0.6846 | -0.6846 |
| Sodic Saline Soil -> P Cycle Functional Genes | 0 | -0.8792 | -0.8792 |
| Sodic Saline Soil -> Soil P Pool | 0 | -0.477 | -0.477 |
| Sodic Saline Soil -> Plant Growth Performance | 0 | 0.0669 | 0.0669 |
| Soil Chemical Property -> ALP Activity | -0.862 | 0 | -0.8623 |
| Soil Chemical Property -> Soil P Pool | 1.082 | -0.8179 | 0.2645 |
| Soil Chemical Property -> Plant Growth Performance | 0 | -0.8684 | -0.8684 |
| Ions In Sodic Saline Soil -> P Cycle Functional Genes | -0.883 | 0 | -0.8831 |
| Ions In Sodic Saline Soil -> Soil P Pool | 0 | -0.7042 | -0.7042 |
| Ions In Sodic Saline Soil -> Plant Growth Performance | 0 | 0.7656 | 0.7656 |
| Soil Physical Structure -> ALP Activity | -0.105 | 0 | -0.1048 |
| Soil Physical Structure -> P Cycle Functional Genes | 0.444 | 0 | 0.4437 |
| Soil Physical Structure -> Soil P Pool | 0 | 0.2543 | 0.2543 |
| Soil Physical Structure -> Plant Growth Performance | 0 | -0.4361 | -0.4361 |
| ALP Activity -> Soil P Pool | 0.949 | 0 | 0.9486 |
| ALP Activity -> Plant Growth Performance | 0.881 | -0.3902 | 0.4907 |
| P Cycle Functional Genes -> Soil P Pool | 0.797 | 0 | 0.7974 |
| P Cycle Functional Genes -> Plant Growth Performance | -0.539 | -0.328 | -0.8669 |
| Soil P Pool -> Plant Growth Performance | -0.411 | 0 | -0.4114 |
